# Supplementary material
Source: publisher figshare collection journal article supplement (https://frontiersin.figshare.com/ndownloader/files/26199668)
Supplement: Supplementary file [file 26199668]

$$^{12}\text{C}^{15}\text{N}/(^{12}\text{C}^{14}\text{N}+^{12}\text{C}^{15}\text{N})$$

x = 61  $\mu\text{m}$  (l), x = 1242  $\mu\text{m}$  (r)

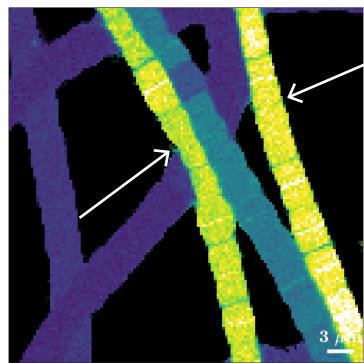

0.5e-2 1e-2 1.5e-2 2e-2 2.5e-2

x = 1510  $\mu\text{m}$

(A)

x = 364  $\mu\text{m}$

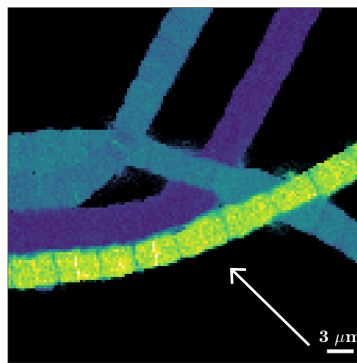

0.5e-2 1e-2 1.5e-2 2e-2 2.5e-2

x = 1949  $\mu\text{m}$

(B)

x = 706  $\mu\text{m}$

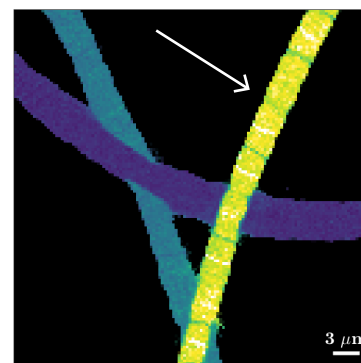

0.5e-2 1e-2 1.5e-2 2e-2 2.5e-2

x = 2225  $\mu\text{m}$

(C)

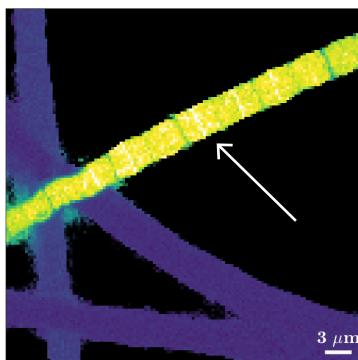

0.5e-2 1e-2 1.5e-2 2e-2 2.5e-2

(D)

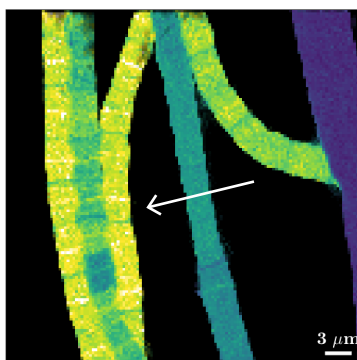

0.5e-2 1e-2 1.5e-2 2e-2 2.5e-2

(E)

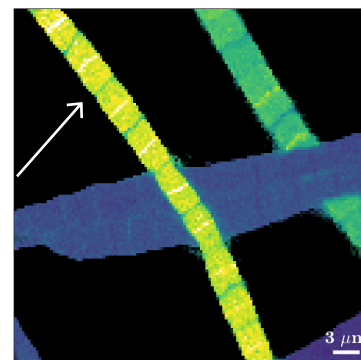

0.5e-2 1e-2 1.5e-2 2e-2 2.5e-2

(F)

x = 2317  $\mu\text{m}$

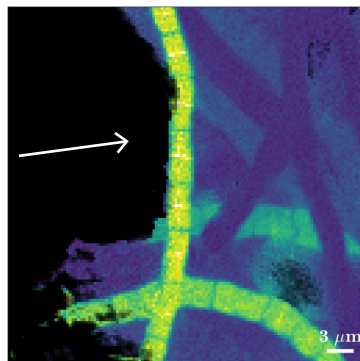

0.5e-2 1e-2 1.5e-2 2e-2 2.5e-2

(G)

x = 2440  $\mu\text{m}$

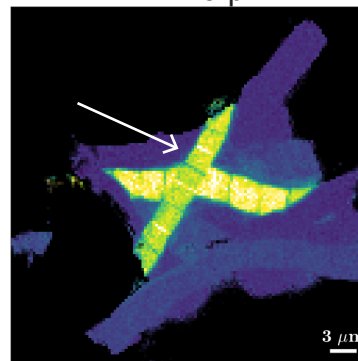

0.5e-2 1e-2 1.5e-2 2e-2 2.5e-2

(H)
